# Supplementary material
Source: Research Square preprint supplement (doi:10.21203/rs.3.rs-9339750/v1)
Supplement: Supplementary file 1 [file 3c6c43a5acc31f67f9a43d97.docx]

**Appendix**

**Fig. S1 Elevation and study area distribution in Jiangsu Province**


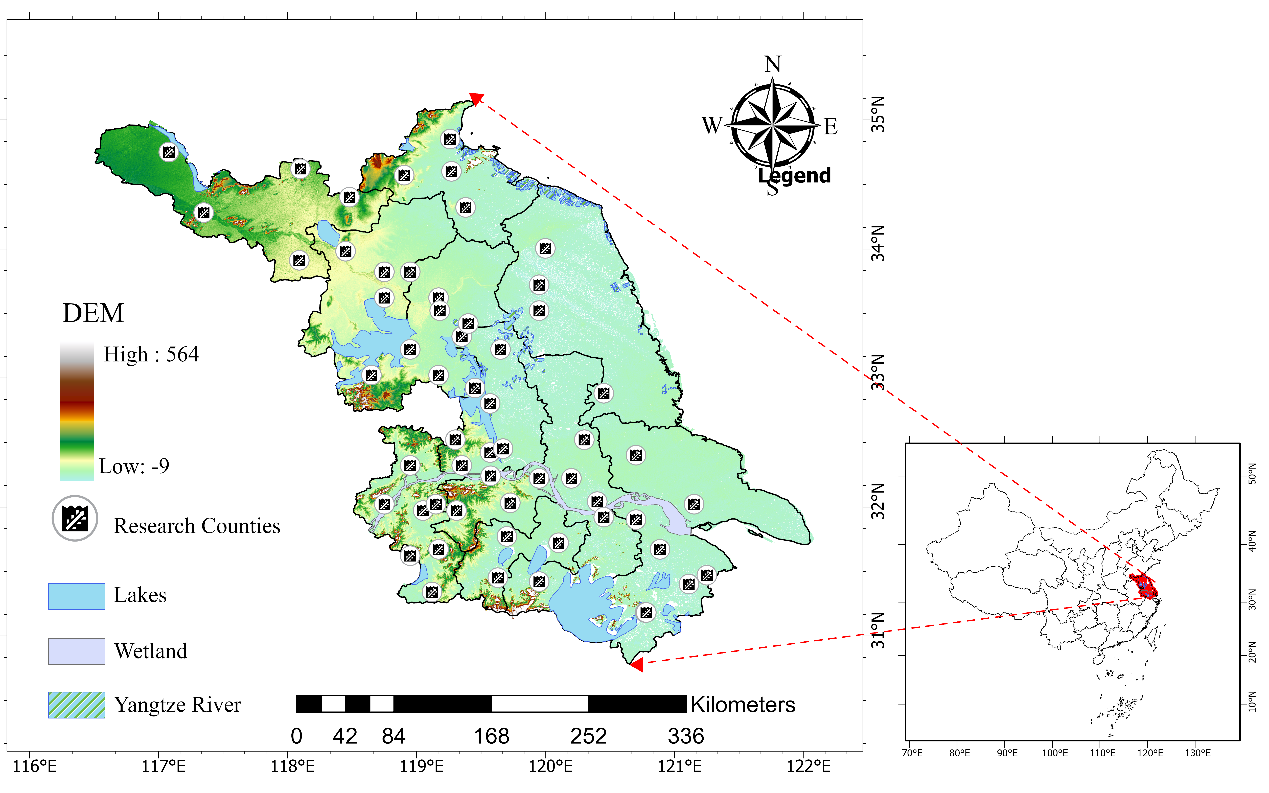


**Fig. S2 Optimal marginal distribution fitting of compound extreme events in Jiangsu Province (1994-2020)**


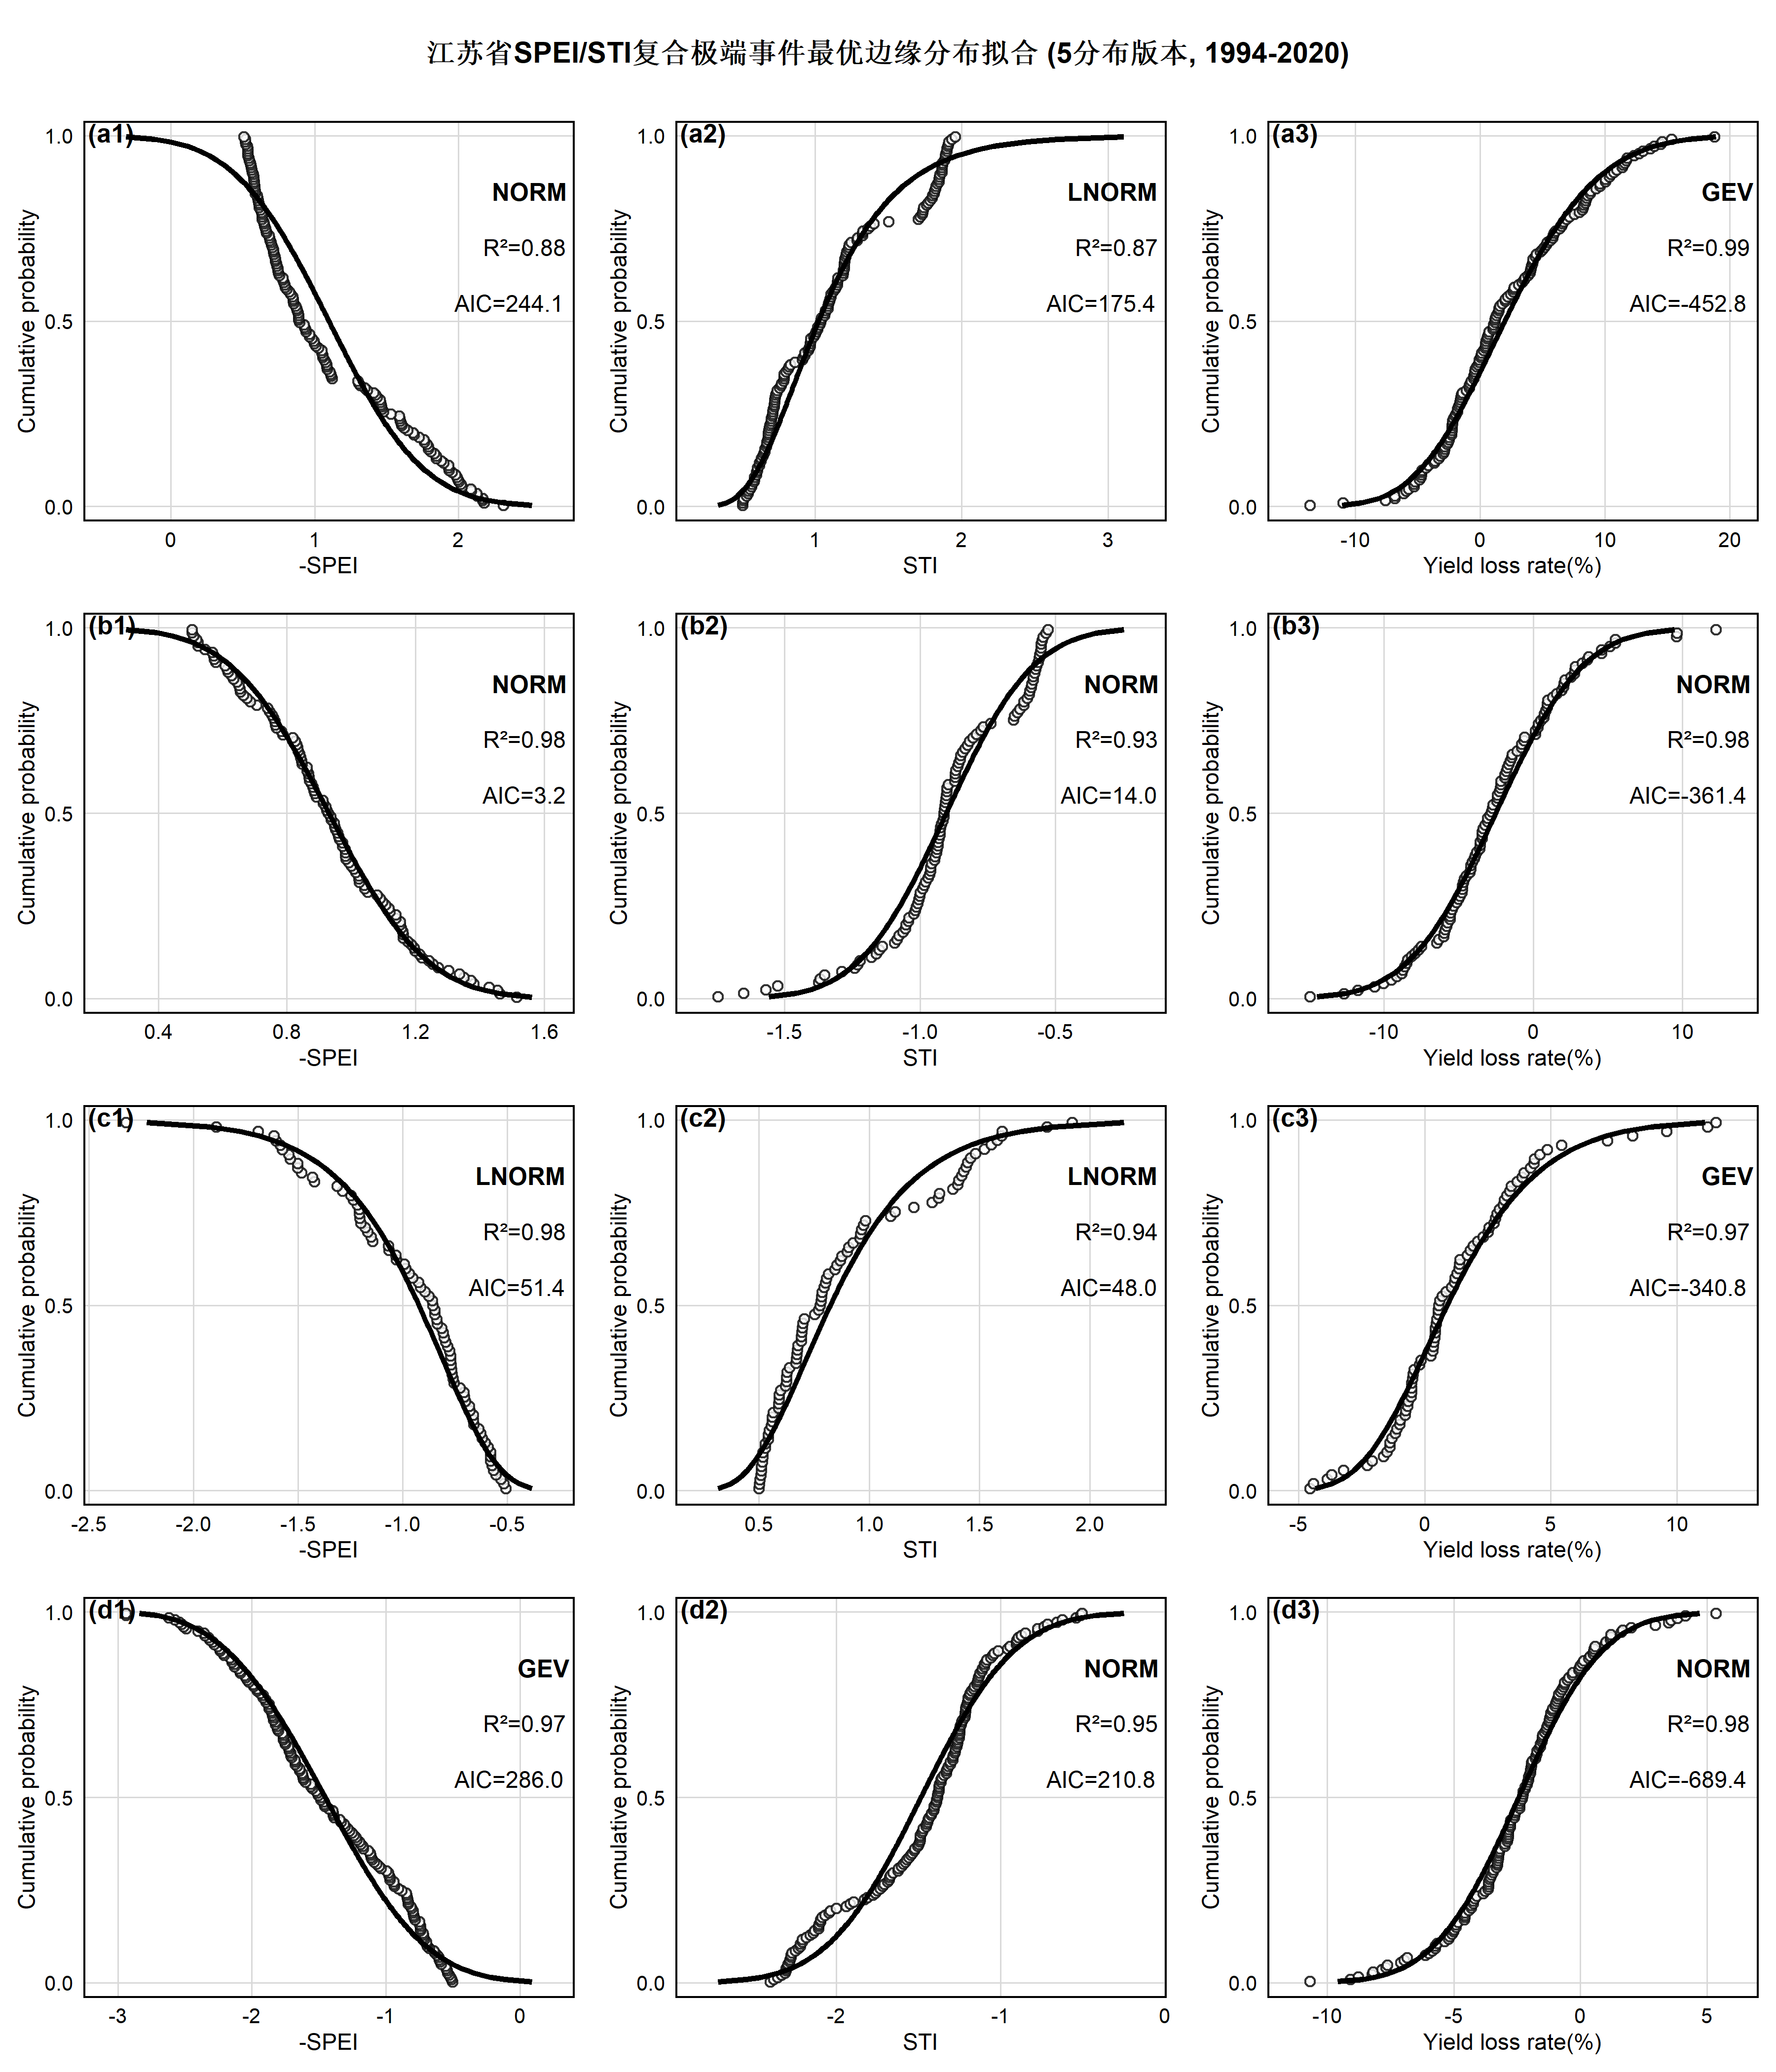


**Fig. S3 Joint probability distribution of SPEI-STI compound extreme events based on vine copula**


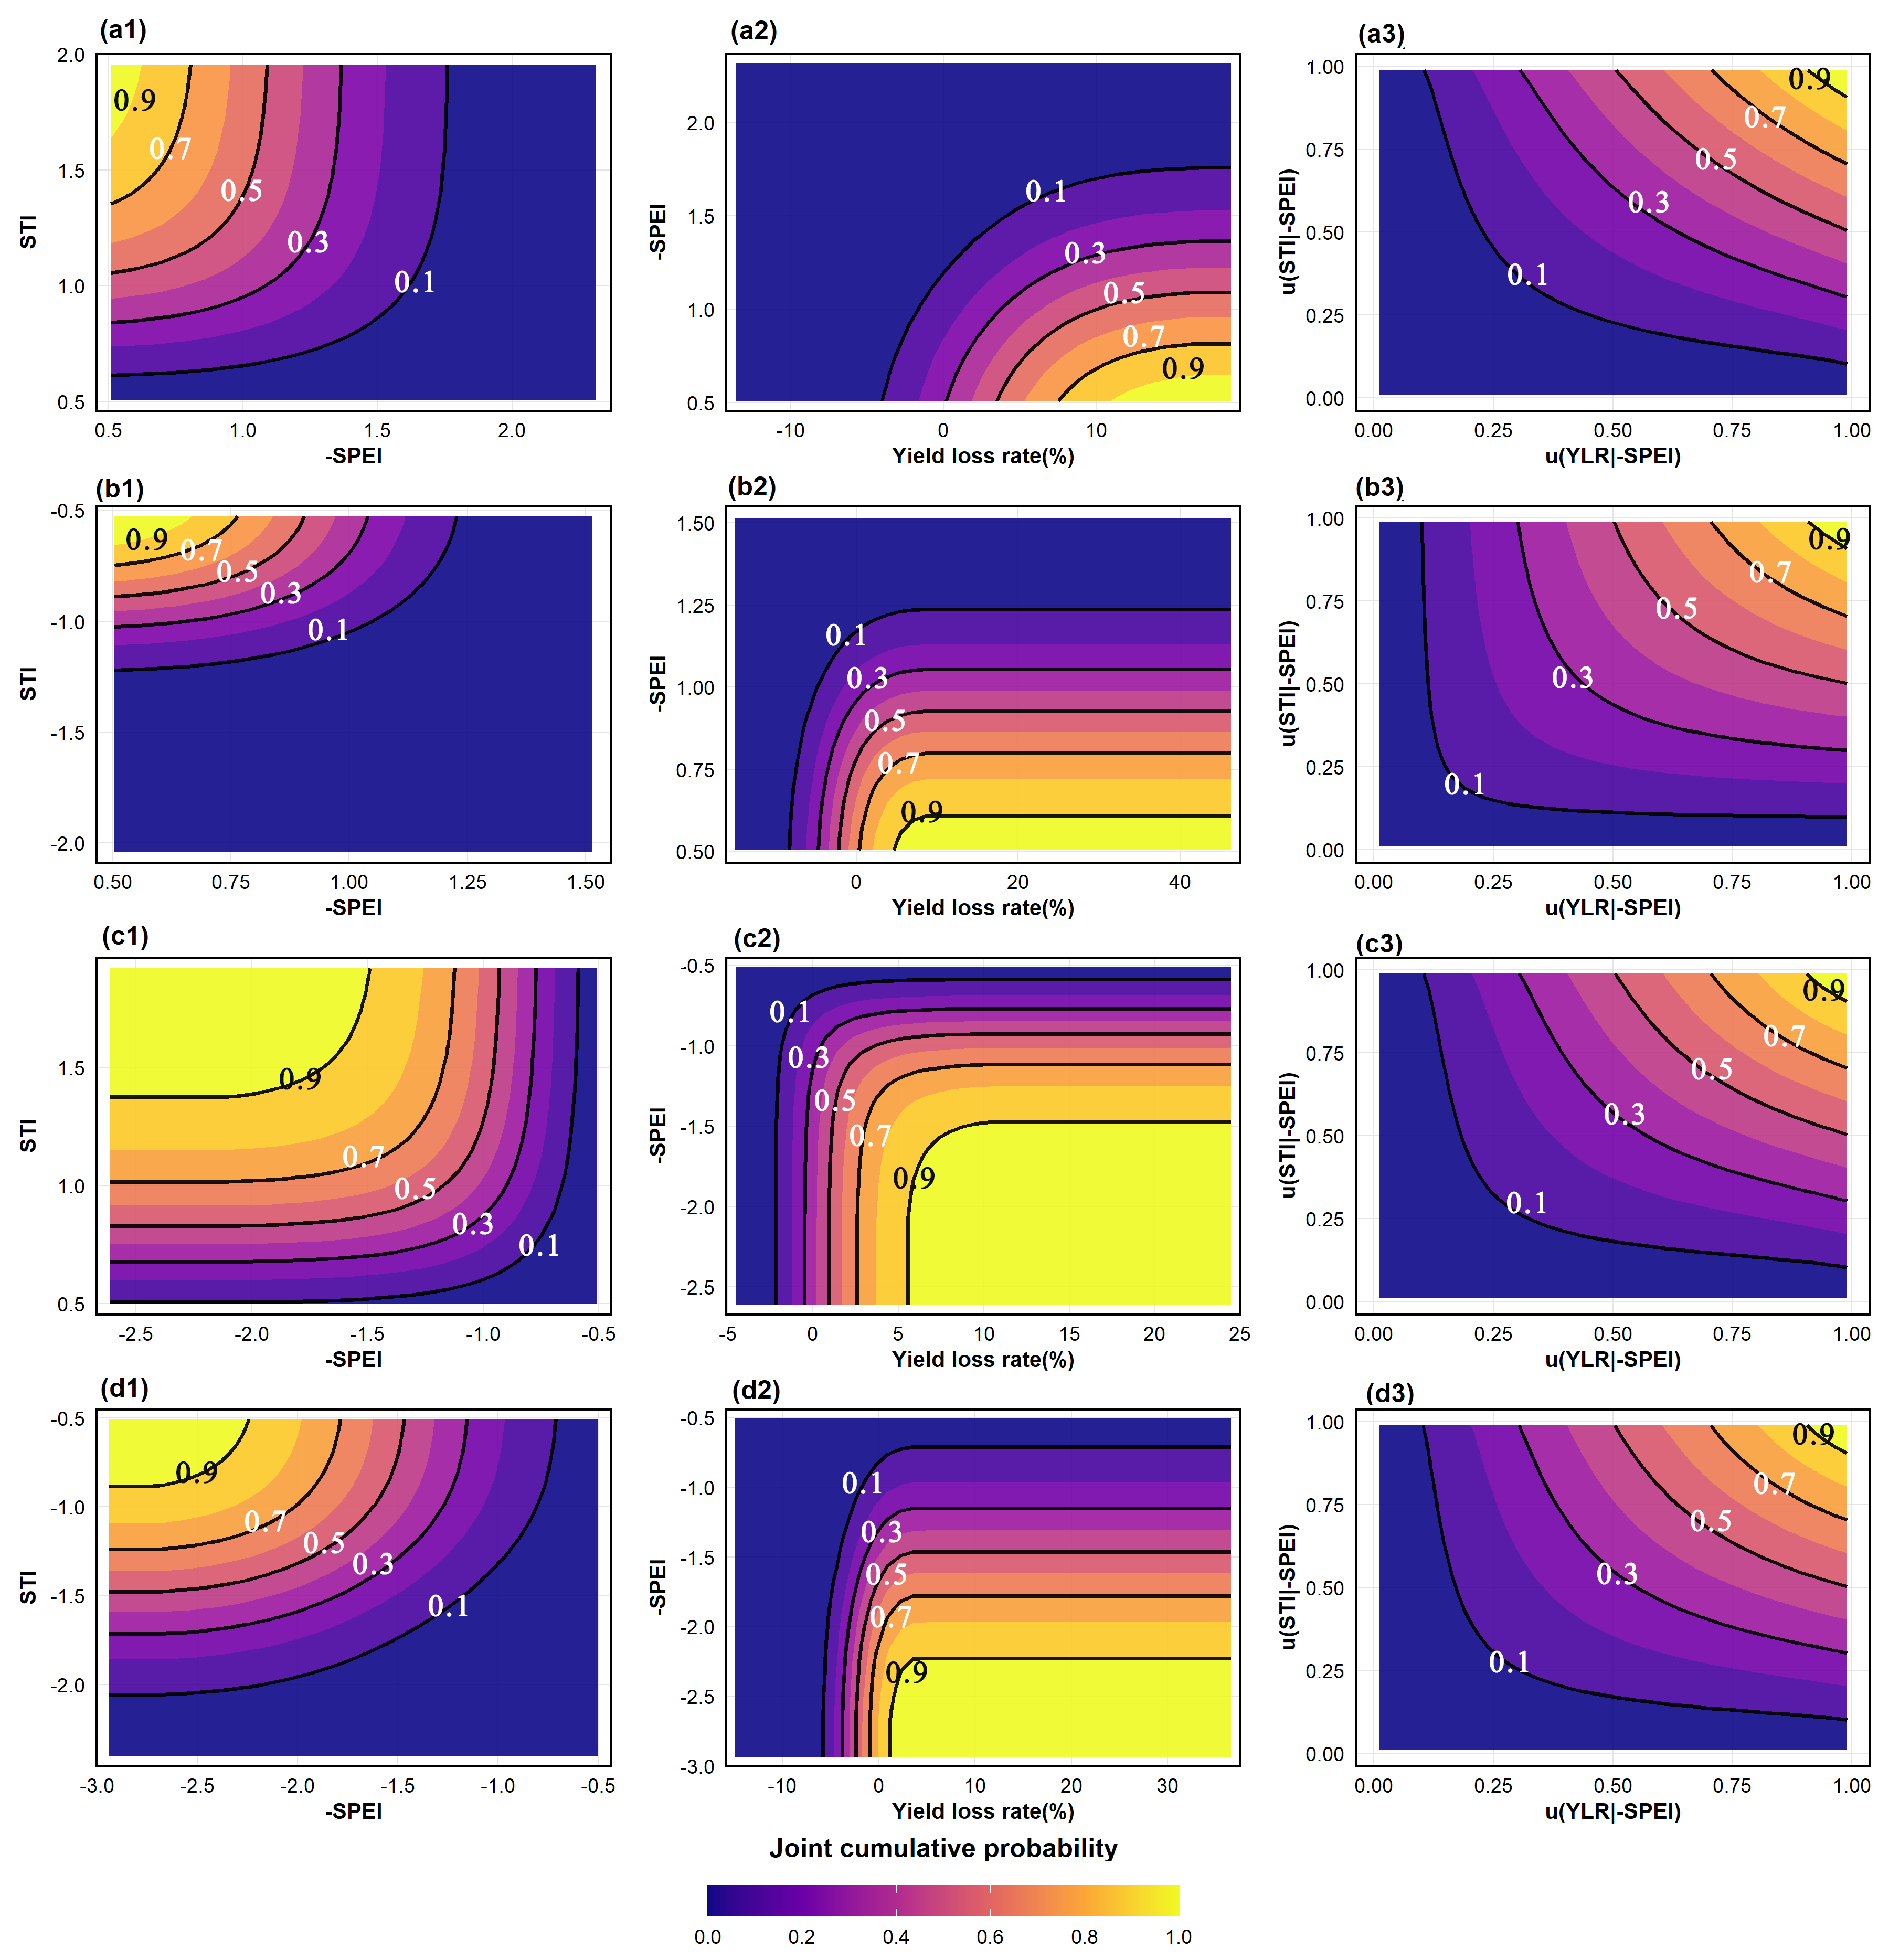


**Table S1 Classification definitions of extreme precipitation and temperature events**

| Extreme moisture condition categories | SPEI | Extreme temperature condition categories | STI |
| --- | --- | --- | --- |
| Severe wet (SW) | 1.5 ≤ SPEI | Severe hot (SH) | 1.5 ≤ STI |
| Moderate wet (MW) | 1.0 ≤ SPEI < 1.5 | Moderate hot (MH) | 1.0 ≤ STI < 1.5 |
| Light wet (LW) | 0.5 ≤ SPEI < 1.0 | Light hot (LH) | 0.5 ≤ STI < 1.0 |
| No water stress | -0.5 < SPEI < 0.5 | No temperature stress | -0.5 < STI < 0.5 |
| Light drought (LD) | -1.0 < SPEI ≤ -0.5 | Light cold (LC) | -1.0 < STI ≤ -0.5 |
| Moderate drought (MD) | -1.5 < SPEI ≤ -1.0 | Moderate cold (MC) | -1.5 < STI ≤ -1.0 |
| Severe drought (SD) | SPEI ≤ -1.5 | Severe cold (SC) | STI ≤ -1.5 |

**Table S2 Candidate copula functions and their parameter ranges**

| Copula |  | Parameter |
| --- | --- | --- |
| Frank |  |  |
| Gumbel |  |  |
| Gaussian |  |  |
| Student’s t |  |  |
| BB1 (Joe-Clayton) |  |  |
| Rotated Clayton |  |  |
